# Supplementary material
Source: publisher figshare collection journal article supplement (https://sage.figshare.com/ndownloader/files/24172162)
Supplement: Supplementary file 1 [file 24172162]

# **Glycosaminoglycan-protein interactions: the first draft of the glycosaminoglycan interactome**

Sylvain D. Vallet, Olivier Clerc and Sylvie Ricard-Blum\*

Univ Lyon, University Claude Bernard Lyon 1, CNRS, INSA Lyon, CPE, Institute of Molecular and Supramolecular Chemistry and Biochemistry, UMR 5246, F-69622 Villeurbanne cedex, France

## **SUPPLEMENTAL MATERIAL**

**Supplementary Figure S1.** The interactome of the six mammalian glycosaminoglycans (GAGs) including GAG-protein interactions and interactions between GAG protein partners.

**Supplementary Table S1.** List of glycosaminoglycan-protein interactions and protein-protein interactions between the protein partners of glycosaminoglycans included in the comprehensive GAG interactome.

**Supplementary Table S2:** List of proteins binding to three, four or five glycosaminoglycans.

**Supplementary Table S3:** Enrichment analysis report of the GAG interactome using FunRich.

**Supplementary Table S4:** List of the 25 most relevant pathways sorted by p-value identified by pathway analysis of the GAG interactome using Reactome.

## Chondroitin sulfate

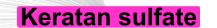

## Heparin/Heparan sulfate
